# Supplementary material for: A chromotropic PtIIPdIICoII coordination polymer with dual electrocatalytic activity for water reduction and oxidation
Source: Royal Society of Chemistry journal article supplement (doi:10.1039/d1dt02587b), 2021-01-01
Supplement: d1dt02587b1.pdf [file d1dt02587b1.pdf]

## **ELECTRONIC SUPPORTING INFORMATION (ESI)**

for

### **A Chromotropic Pt<sup>II</sup>Pd<sup>II</sup>Co<sup>II</sup> Coordination Polymer with Dual Electrocatalytic Activity for Water Reduction and Oxidation**

Anna Carissa M. San Esteban, Naoto Kuwamura, Nobuto Yoshinari and Takumi Konno\*

Department of Chemistry, Graduate School of Science, Osaka University, Toyonaka, Osaka  
560-0043, Japan

E-mail: [konno@chem.sci.osaka-u.ac.jp](mailto:konno@chem.sci.osaka-u.ac.jp)

**Table S1.** Crystallographic data for [2]X<sub>4</sub>.

|                                                                   | [2]Cl <sub>4</sub>                                                                                                                            | [2]Br <sub>4</sub>                                                                                                                            |
|-------------------------------------------------------------------|-----------------------------------------------------------------------------------------------------------------------------------------------|-----------------------------------------------------------------------------------------------------------------------------------------------|
| Formula                                                           | C <sub>20</sub> H <sub>92</sub> Cl <sub>4</sub> Co <sub>2</sub> N <sub>8</sub> O <sub>30</sub> Pd <sub>2</sub> Pt <sub>2</sub> S <sub>4</sub> | C <sub>20</sub> H <sub>92</sub> Br <sub>4</sub> Co <sub>2</sub> N <sub>8</sub> O <sub>30</sub> Pd <sub>2</sub> Pt <sub>2</sub> S <sub>4</sub> |
| Colour, shape                                                     | Orange, platelet                                                                                                                              | Orange, platelet                                                                                                                              |
| <i>M</i>                                                          | 1915.89                                                                                                                                       | 2093.73                                                                                                                                       |
| Crystal system                                                    | Orthorhombic                                                                                                                                  | Orthorhombic                                                                                                                                  |
| Space group                                                       | <i>P</i> 2 <sub>1</sub> 2 <sub>1</sub> 2 <sub>1</sub>                                                                                         | <i>P</i> 2 <sub>1</sub> 2 <sub>1</sub> 2 <sub>1</sub>                                                                                         |
| <i>a</i> /Å                                                       | 9.0942(2)                                                                                                                                     | 9.25625(5)                                                                                                                                    |
| <i>b</i> /Å                                                       | 21.9908(5)                                                                                                                                    | 21.99085(11)                                                                                                                                  |
| <i>c</i> /Å                                                       | 30.830(8)                                                                                                                                     | 30.87849(16)                                                                                                                                  |
| <i>α</i> /°                                                       | 90                                                                                                                                            | 90                                                                                                                                            |
| <i>β</i> /°                                                       | 90                                                                                                                                            | 90                                                                                                                                            |
| <i>γ</i> /°                                                       | 90                                                                                                                                            | 90                                                                                                                                            |
| <i>V</i> /Å <sup>3</sup>                                          | 6165.7(16)                                                                                                                                    | 6285.40(6)                                                                                                                                    |
| <i>Z</i>                                                          | 4                                                                                                                                             | 4                                                                                                                                             |
| <i>T</i> /K                                                       | 100(2)                                                                                                                                        | 100(2)                                                                                                                                        |
| <i>F</i> (000)                                                    | 3768                                                                                                                                          | 4056                                                                                                                                          |
| <i>ρ</i> <sub>calcd</sub> /g cm <sup>-3</sup>                     | 2.064                                                                                                                                         | 2.213                                                                                                                                         |
| <i>μ</i> /mm <sup>-1</sup>                                        | 6.007                                                                                                                                         | 2.491                                                                                                                                         |
| Crystal size /mm <sup>3</sup>                                     | 0.16×0.10×0.03                                                                                                                                | 0.08×0.05×0.04                                                                                                                                |
| Limiting indices                                                  | -9 ≤ <i>h</i> ≤ 11,<br>-29 ≤ <i>k</i> ≤ 21,<br>-38 ≤ <i>l</i> ≤ 34                                                                            | -14 ≤ <i>h</i> ≤ 13,<br>-35 ≤ <i>k</i> ≤ 37,<br>-45 ≤ <i>l</i> ≤ 44                                                                           |
| <i>R</i> <sub>1</sub> ( <i>I</i> > 2σ( <i>I</i> )) <sup>[a]</sup> | 0.0410                                                                                                                                        | 0.0394                                                                                                                                        |
| <i>wR</i> <sub>2</sub> (all data) <sup>[b]</sup>                  | 0.0973                                                                                                                                        | 0.1041                                                                                                                                        |
| GOF                                                               | 1.042                                                                                                                                         | 1.050                                                                                                                                         |
| Flack parameter                                                   | 0.015(4)                                                                                                                                      | 0.040(5)                                                                                                                                      |
| CCDC No.                                                          | 2074818                                                                                                                                       | 2074819                                                                                                                                       |

[a]  $R_1 = \Sigma(|F_o| - |F_c|) / \Sigma(|F_o|)$ . [b]  $wR_2 = [\Sigma w(F_o^2 - F_c^2)^2 / \Sigma w(F_o^2)^2]^{1/2}$ .

**Table S2.** Bond valence sum (BVS) calculations for Co atoms in [2]X<sub>4</sub>.<sup>[S1]</sup>

|     | [2]Cl <sub>4</sub> |                   | [2]Br <sub>4</sub> |                   |
|-----|--------------------|-------------------|--------------------|-------------------|
|     | Co <sup>II</sup>   | Co <sup>III</sup> | Co <sup>II</sup>   | Co <sup>III</sup> |
| Co1 | 2.01               | 1.77              | 1.99               | 1.75              |
| Co2 | 2.00               | 1.73              | 2.01               | 1.73              |

**Table S3.** Best fitted parameters for  $\chi_{\text{M}}T$  versus  $T$  plots of [2]X<sub>4</sub>.

|                          | [2]Cl <sub>4</sub> (heating) | [2]Cl <sub>4</sub> (cooling) | [2]Br <sub>4</sub> (heating) | [2]Br <sub>4</sub> (cooling) |
|--------------------------|------------------------------|------------------------------|------------------------------|------------------------------|
| $J / \text{cm}^{-1}$     | -0.966(7)                    | -0.03(3)                     | -0.856(7)                    | -0.12(2)                     |
| $B^0_2 / \text{cm}^{-1}$ | +108.7(12)                   | +11.3(5)                     | +118.3(11)                   | +13.2(4)                     |
| $g_{\text{iso}}$         | 2.0758(14)                   | 2.322(7)                     | 2.0472(11)                   | 2.306(6)                     |
| T.I.P.                   | -0.00188(6)                  | 0.00075(13)                  | -0.00130(5)                  | 0.00121(11)                  |
| $F$ [a]                  | $2.34 \times 10^{-6}$        | $5.00 \times 10^{-5}$        | $2.56 \times 10^{-6}$        | $2.65 \times 10^{-5}$        |

[a] The agreement factor ( $F$ ) is defined as  $\Sigma[\chi_{\text{M}}T_{\text{exp}} - \chi_{\text{M}}T_{\text{calcd}}]^2 / \Sigma[\chi_{\text{M}}T_{\text{exp}}]^2$ .

**Table S4.** Summary of representative heterogeneous water oxidation catalysts based on cobalt(II) coordination compounds.

| Compound                                                                                                                                                          | Overpotential [a] | TOF                         | Electrolyte                                                           | Reference #   |
|-------------------------------------------------------------------------------------------------------------------------------------------------------------------|-------------------|-----------------------------|-----------------------------------------------------------------------|---------------|
| [2]Br <sub>4</sub>                                                                                                                                                | 363 mV            | 0.0044 s <sup>-1</sup>      | 0.1 M LiClO <sub>4</sub> in H <sub>2</sub> O/CH <sub>3</sub> CN (1/4) | This work     |
| [Mn <sub>2</sub> (H <sub>2</sub> O) <sub>6</sub> (1)]Br <sub>4</sub>                                                                                              | 384 mV            | 0.0025 s <sup>-1</sup>      | 0.1 M LiClO <sub>4</sub> in H <sub>2</sub> O/CH <sub>3</sub> CN (1/4) | This work, S2 |
| [Zn(Cu <sub>2</sub> {Pt(NH <sub>3</sub> ) <sub>2</sub> (D-pen) <sub>2</sub> }) <sub>2</sub> ](ClO <sub>4</sub> ) <sub>2</sub>                                     | -                 | 0.0075 s <sup>-1</sup>      | 0.1 M KPF <sub>6</sub> in H <sub>2</sub> O/CH <sub>3</sub> CN (1/4)   | S3            |
| [Co <sub>2</sub> (L)(adip) <sub>2</sub> ] <sup>[b]</sup>                                                                                                          | 460 mV            | 0.00068 s <sup>-1</sup> [c] | 0.2 M Pi buffer (pH 6.8)                                              | S4            |
| [Co <sub>2</sub> (L) <sub>2</sub> (5-bdc) <sub>2</sub> (H <sub>2</sub> O) <sub>2</sub> ] <sup>[b]</sup>                                                           | 570 mV            | 0.00076 s <sup>-1</sup> [c] | 0.2 M Pi buffer (pH 6.8)                                              | S4            |
| [{Co <sub>3</sub> (μ <sub>3</sub> -OH)(BTB) <sub>2</sub> (dpe) <sub>2</sub> }{Co(H <sub>2</sub> O) <sub>4</sub> (DMF) <sub>2</sub> }] <sub>n</sub> <sup>[b]</sup> | 390 mV            | 0.05 s <sup>-1</sup>        | 0.1 M KOH aq.                                                         | S5            |

[a] at 1 mA /cm<sup>2</sup>. [b] L = 1,4-bis(3-pyridylaminomethyl)benzene, H<sub>2</sub>adip = adipic acid, 5-H<sub>2</sub>adc = 5-nitroisophthalic acid), H<sub>3</sub>BTB=1,3,5-benzenetribenzoic acid, dpe=1,2-di(4-pyridyl)ethylene, dppeO<sub>2</sub> = 1,2-bis(diphenylphosphino)ethane dioxide. [c] We calculated the values based on values provided in the literature.

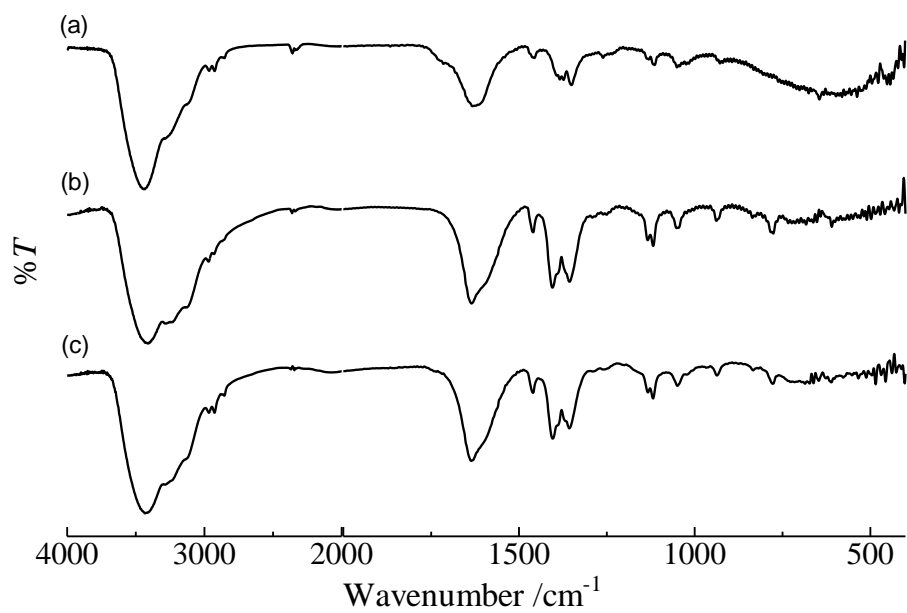

**Fig. S1.** IR spectra of (a) [1], (b) [2]Cl<sub>4</sub>, and (c) [2]Br<sub>4</sub>.

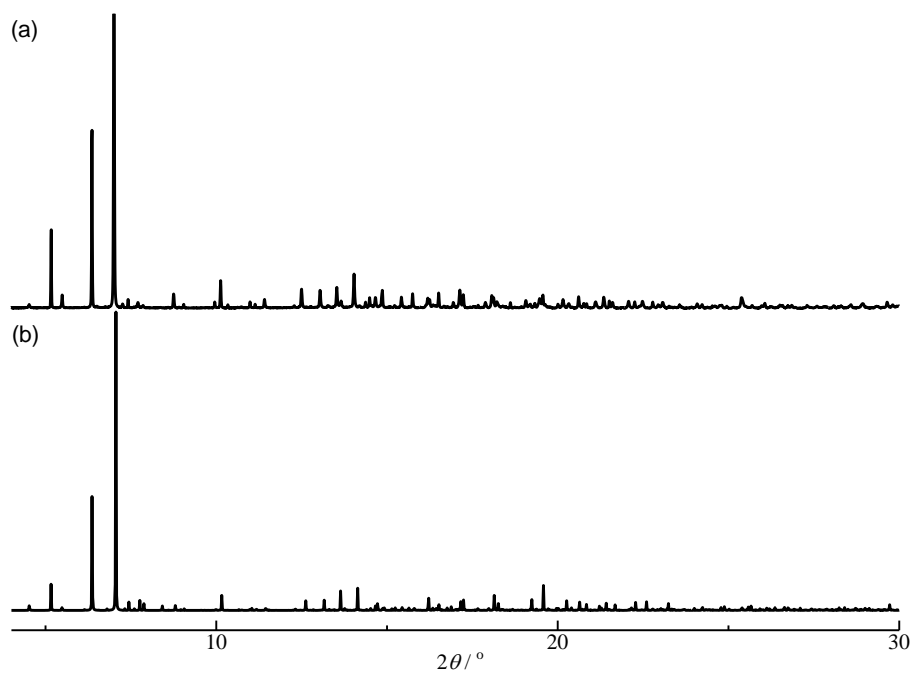

**Fig. S2.** (a) Experimental and (b) simulated PXRD patterns of [2]Cl<sub>4</sub>.

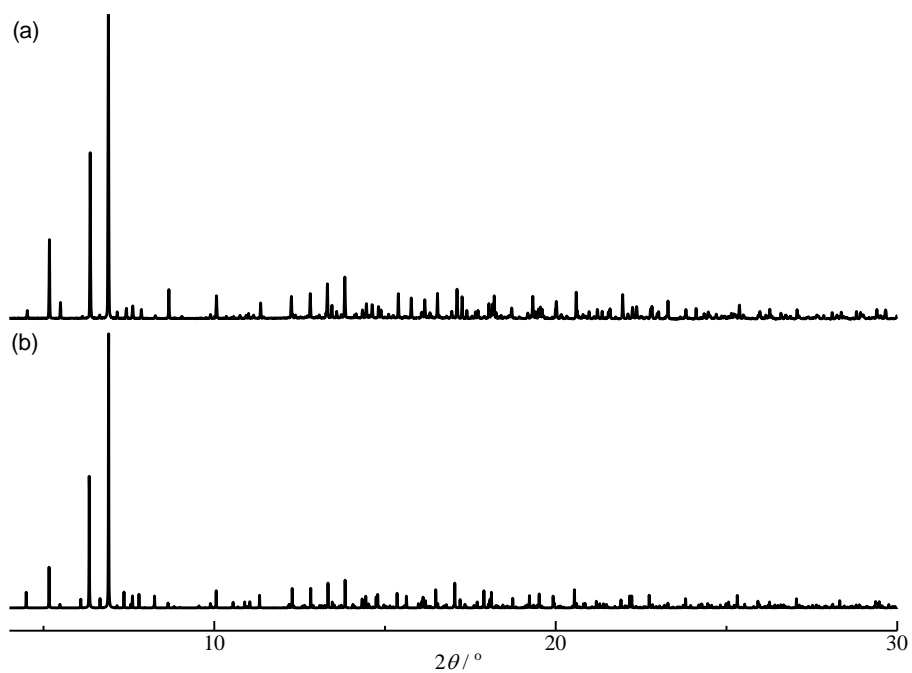

**Fig. S3.** (a) Experimental and (b) simulated PXRD patterns of [2]Br<sub>4</sub>.

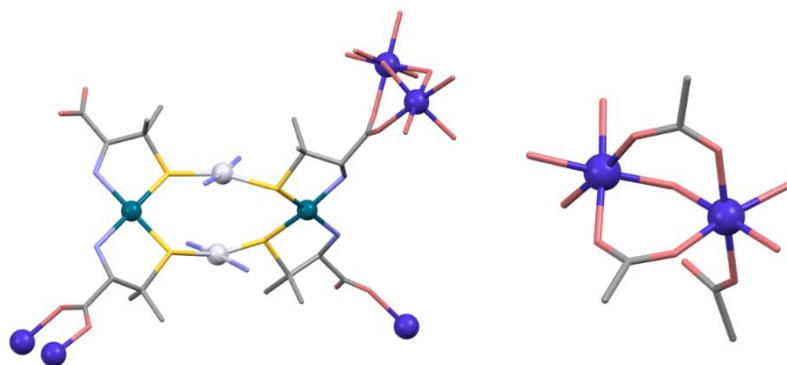

**Fig. S4.** Perspective views (left) around the Pt<sup>II</sup><sub>2</sub>Pd<sup>II</sup><sub>2</sub> molecule, and (right) around the Co<sup>II</sup><sub>2</sub> unit in [2]Br<sub>4</sub>. Hydrogen atoms are omitted for clarity. Colour code: Pd, dark green; Pt, off-white; Co, blue; S, yellow; N, light blue; O, pink; C, grey.

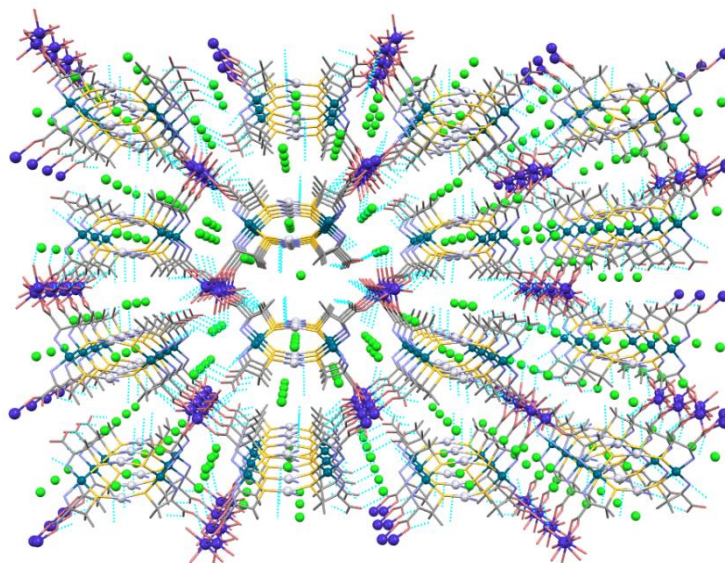

**Fig. S5.** Packing structure of  $[2]Cl_4$ . Blue dashed lines represent hydrogen bonds. Colour code: Pd, dark green; Pt, off-white; Co, blue; Cl, green; S, yellow; N, light blue; O, pink; C, grey.

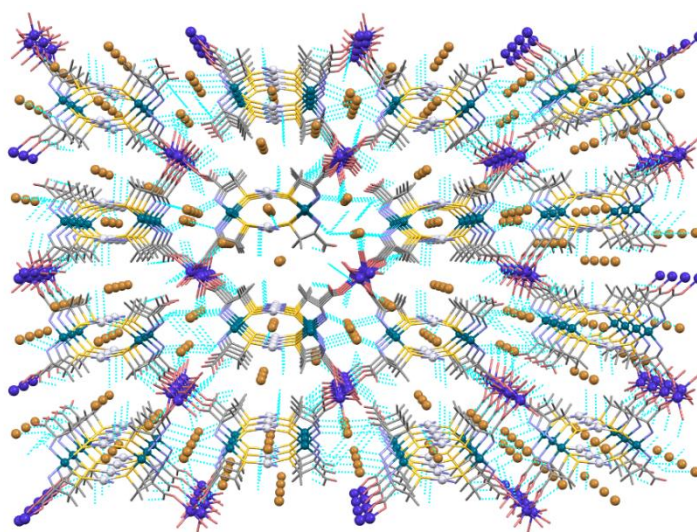

**Fig. S6.** (a) Packing structure of  $[2]Br_4$ . Blue dashed lines represent hydrogen bonds. Colour code: Pd, dark green; Pt, off-white; Co, blue; Br, brown; S, yellow; N, light blue; O, pink; C, grey.

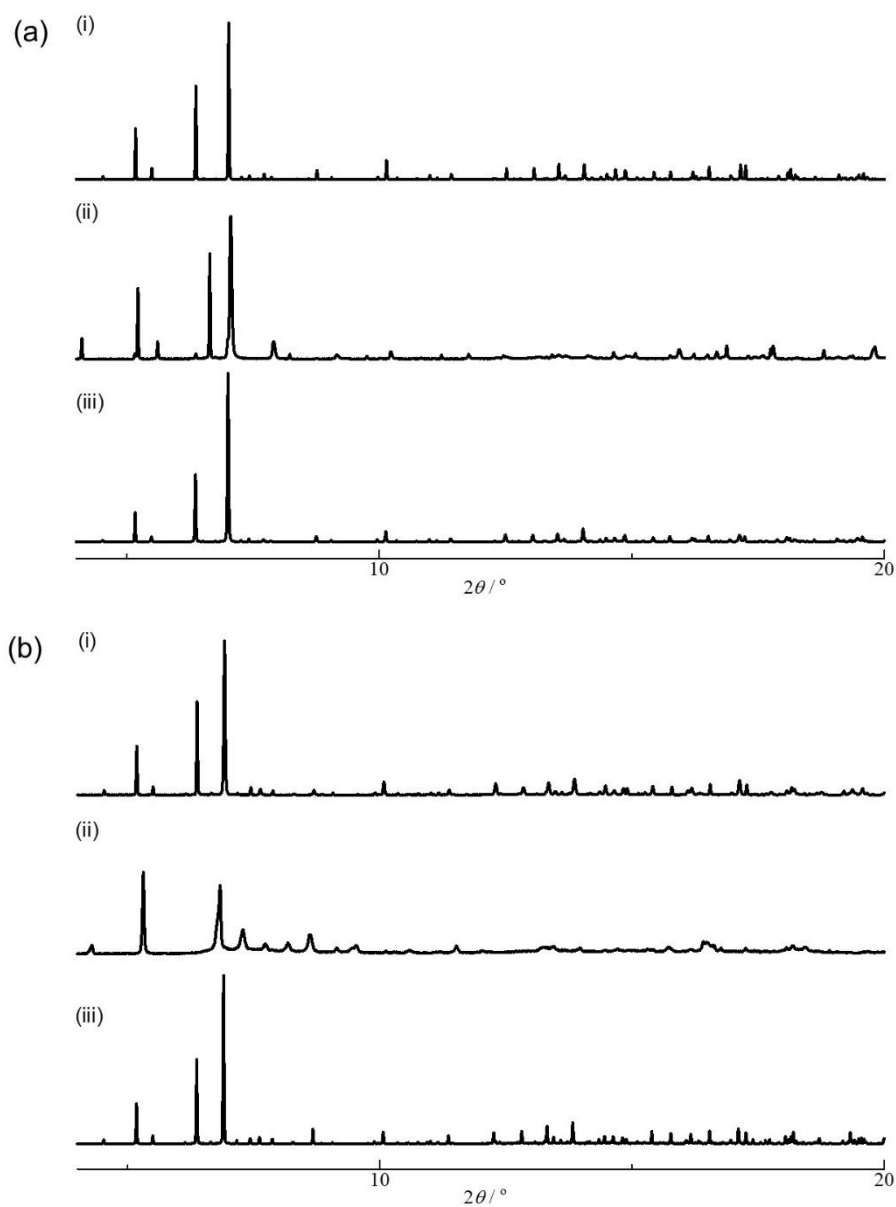

**Fig. S7.** Powder X-ray diffraction patterns of (i)  $[2]X_4$ , (ii) the sample ( $[2']X_4$ ) obtained by heating  $[2]X_4$  at  $90^\circ\text{C}$ , and (iii) the sample obtained by exposure to  $[2']X_4$  in air: (a)  $X = \text{Cl}$ , (b)  $X = \text{Br}$ .

$[2']\text{Cl}_4$ : Calcd. for  $[\text{Co}_2(\text{H}_2\text{O})_2(\mathbf{1})]\text{Cl}_4 \cdot \text{H}_2\text{O}$ : C, 15.27; H, 3.46; N, 7.12%. Anal. Found: C, 15.26; H, 3.38; N, 7.09%.  $[2']\text{Br}_4$ : Calcd. for  $[\text{Co}_2(\text{H}_2\text{O})_2(\mathbf{1})]\text{Br}_4 \cdot \text{H}_2\text{O}$ : C, 13.72; H, 3.11; N, 6.40%. Anal. Found: C, 13.55; H, 3.07; N, 6.28%

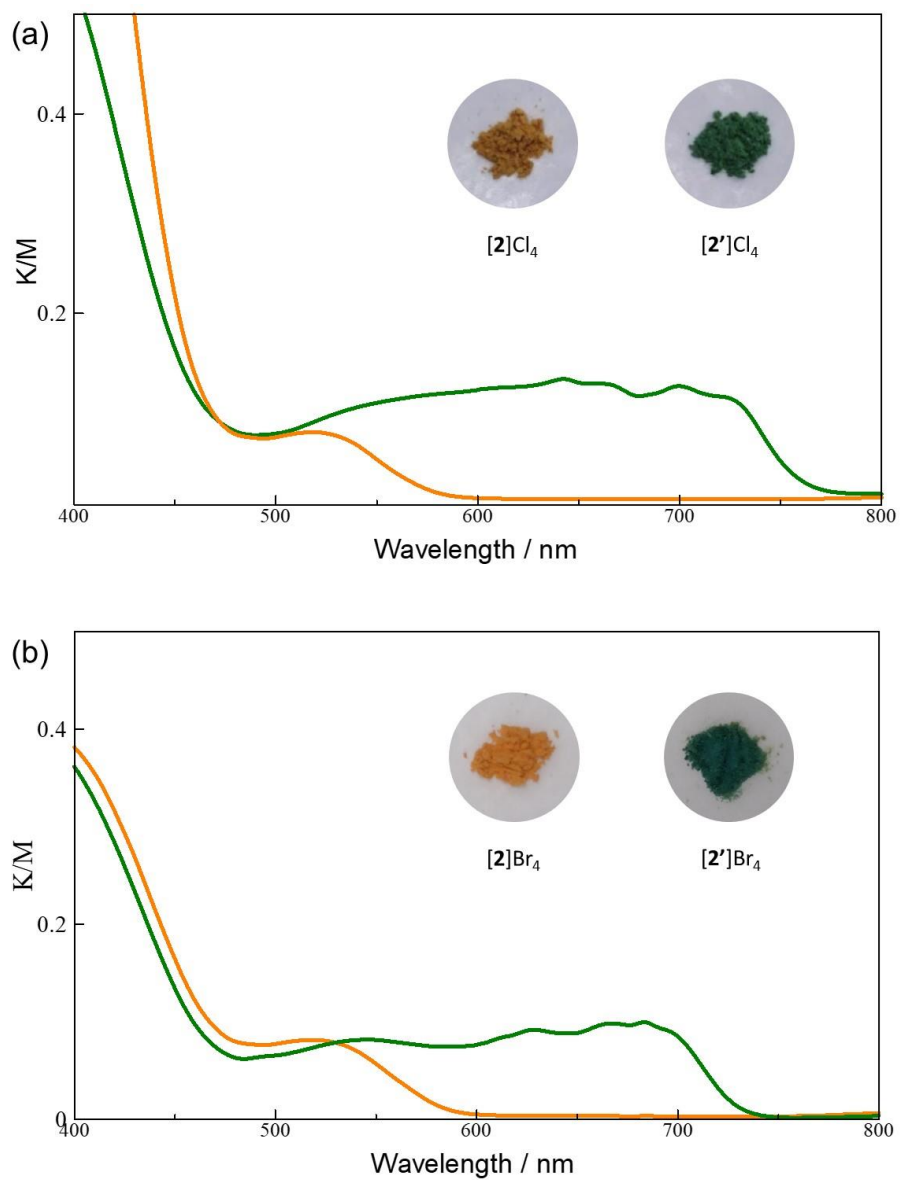

**Fig. S8.** Diffuse reflectance spectra of  $[2]X_4$  (orange) and  $[2']X_4$  (green): (a)  $X = Cl$ , (b)  $X = Br$ .



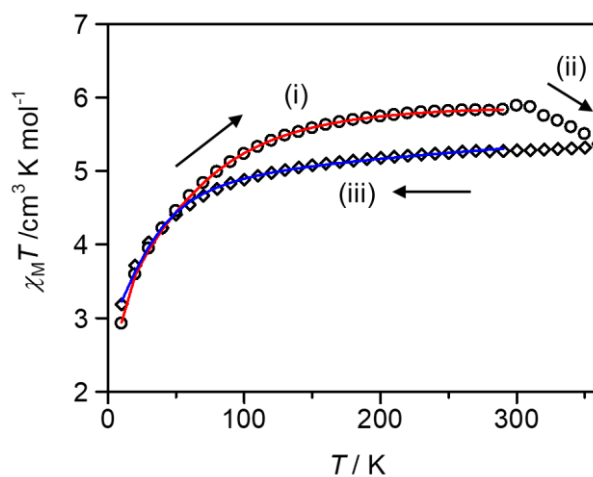

**Fig. S9.**  $\chi_M T$  vs.  $T$  plot of  $[2]\text{Br}_4$  ( $T = 10\text{--}360$  K, and  $H = 0.5$  T). Black circles and diamonds indicate the observed data. Red and blue lines indicate the fitting curves. The measurements with increasing temperature from 10 K to 300 K showed an anomaly at approximately 300–360 K, which corresponds to the transformation from  $[2]\text{Br}_4$  to  $[2']\text{Br}_4$ .

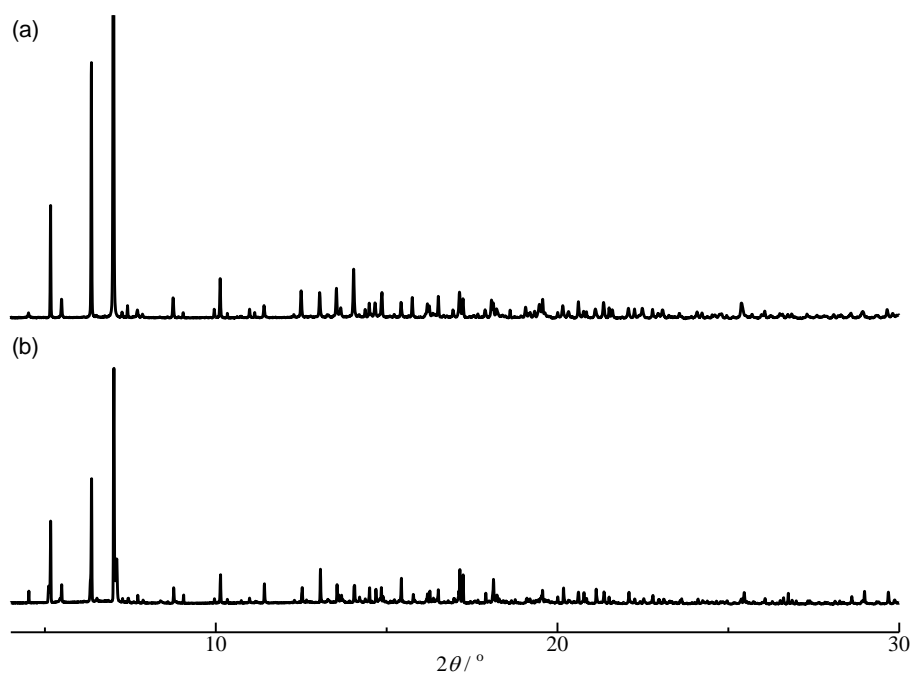

**Fig. S10.** PXRD patterns of  $[2]\text{Cl}_4$  (a) before and (b) after bulk electrolysis at  $-1.2$  V.

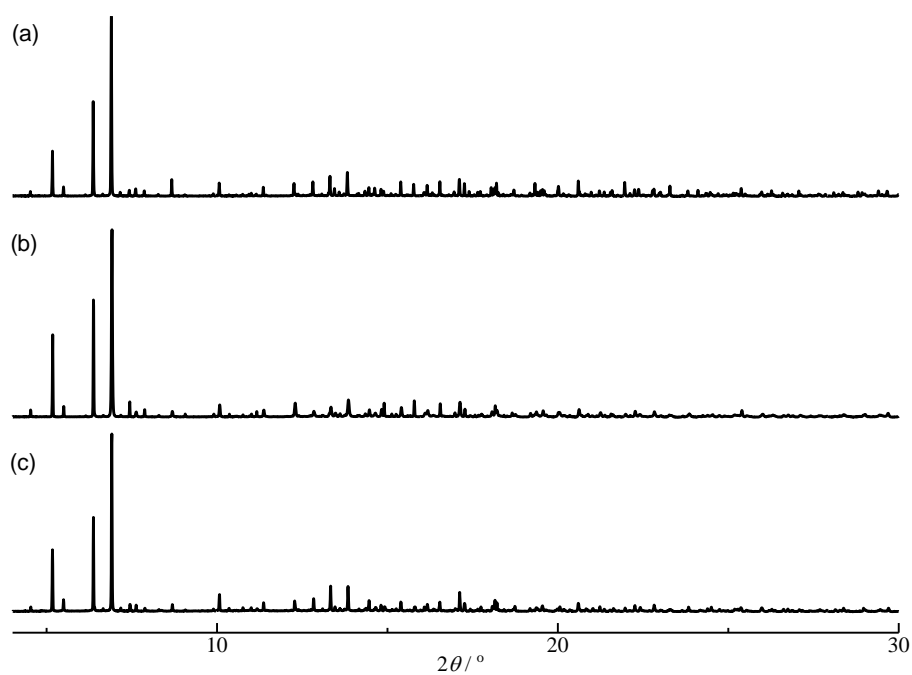

**Fig. S11.** PXRD patterns of [2]Br<sub>4</sub> (a) before and after (b) -1.2 V and (c) +1.2 V bulk electrolyses.

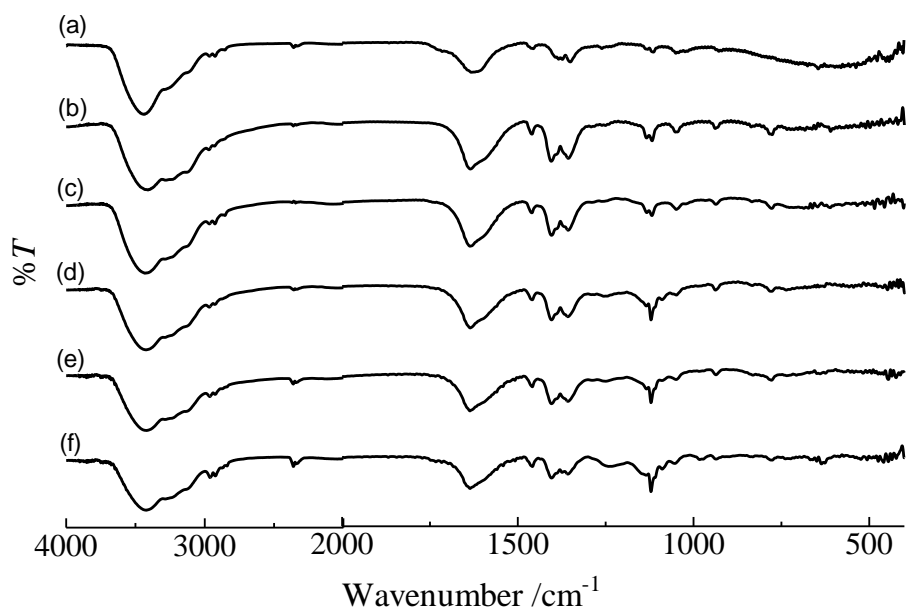

**Fig. S12.** IR spectra of original samples of (a) [1], (b) [2]Cl<sub>4</sub>, and (c) [2]Br<sub>4</sub> and after bulk electrolysis at -1.2 V of (d) [2]Cl<sub>4</sub>, (e) [2]Br<sub>4</sub> and at +1.2 V of (f) [2]Br<sub>4</sub>.

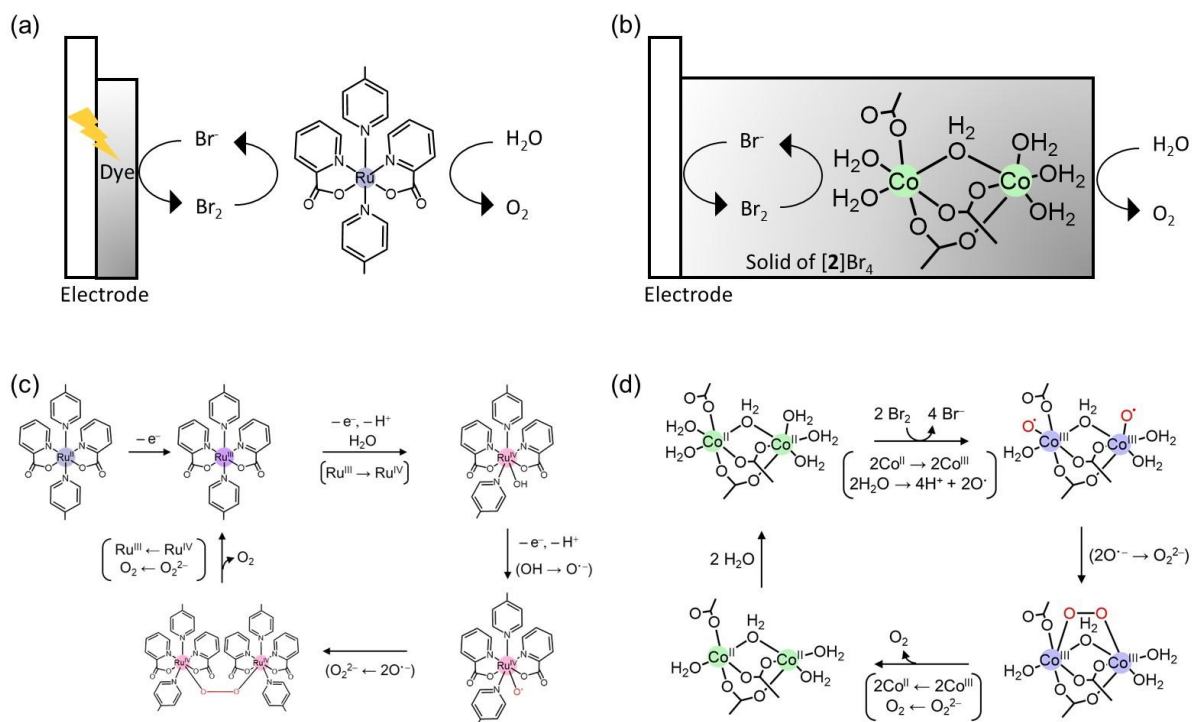

**Fig. S13.** Proposed mechanisms of (a, c) light-driven water oxidation catalysed by  $[\text{Ru}(\text{bda})(\text{pic})_2]$  (bda = 2,2'-bipyridine-6,6'-dicarboxylate, pic = picoline) <sup>[S6]</sup> and (b, d) electrocatalytic water oxidation catalysed by  $[\mathbf{2}]\text{Br}_4$ .

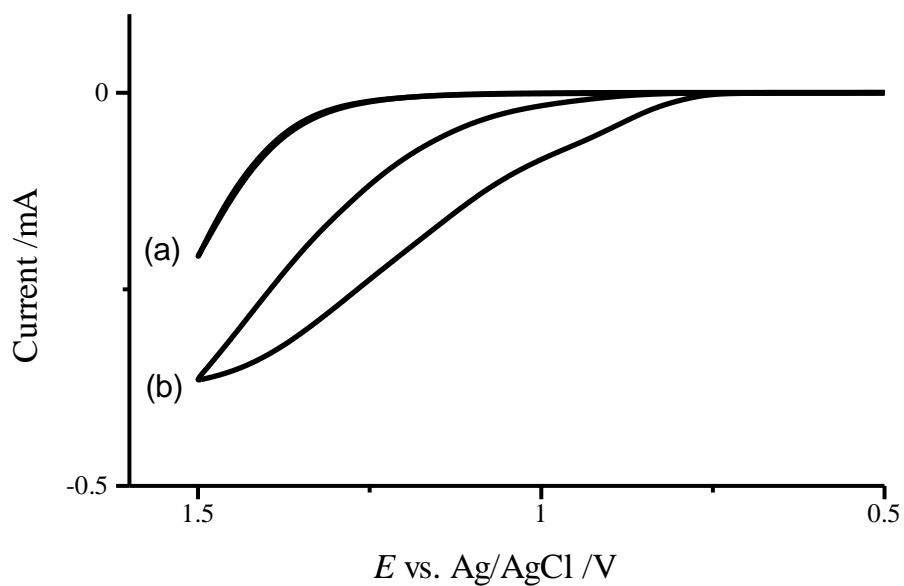

**Fig. S14.** CVs of (a) [2]Cl<sub>4</sub> and (b) [2]Br<sub>4</sub> in H<sub>2</sub>O-CH<sub>3</sub>CN (v/v =1/4) containing 0.1 M LiClO<sub>4</sub> at a scan rate of 10 mV s<sup>-1</sup>.

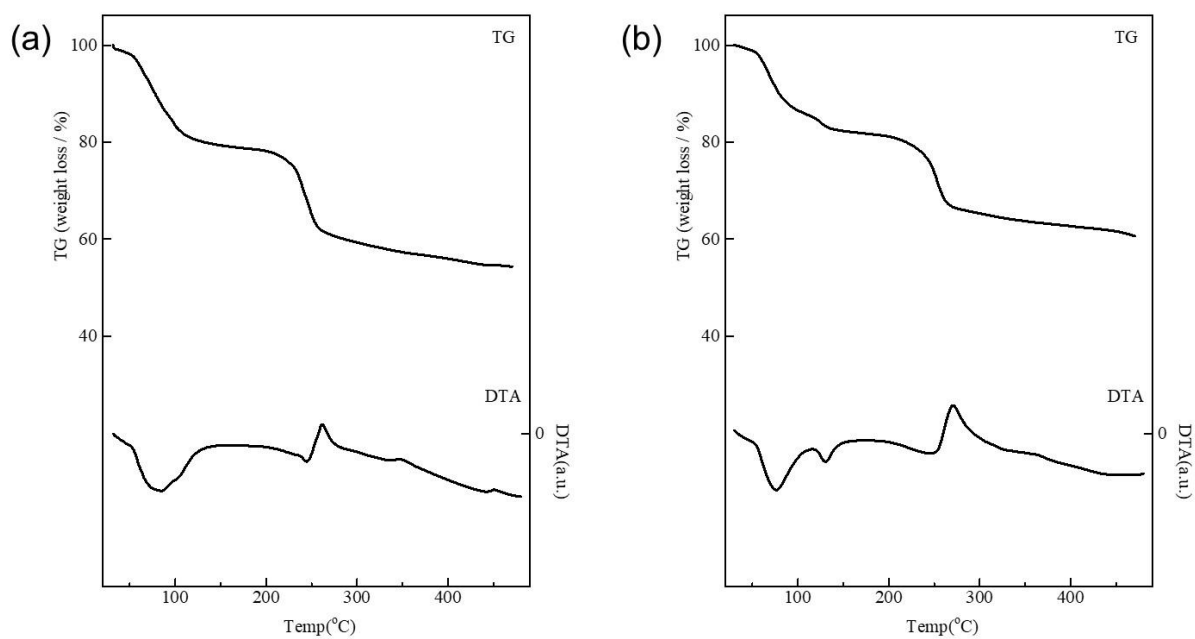

**Fig. S15.** TG-DTA curves of (a) [2]Cl<sub>4</sub> and (b) [2]Br<sub>4</sub>.

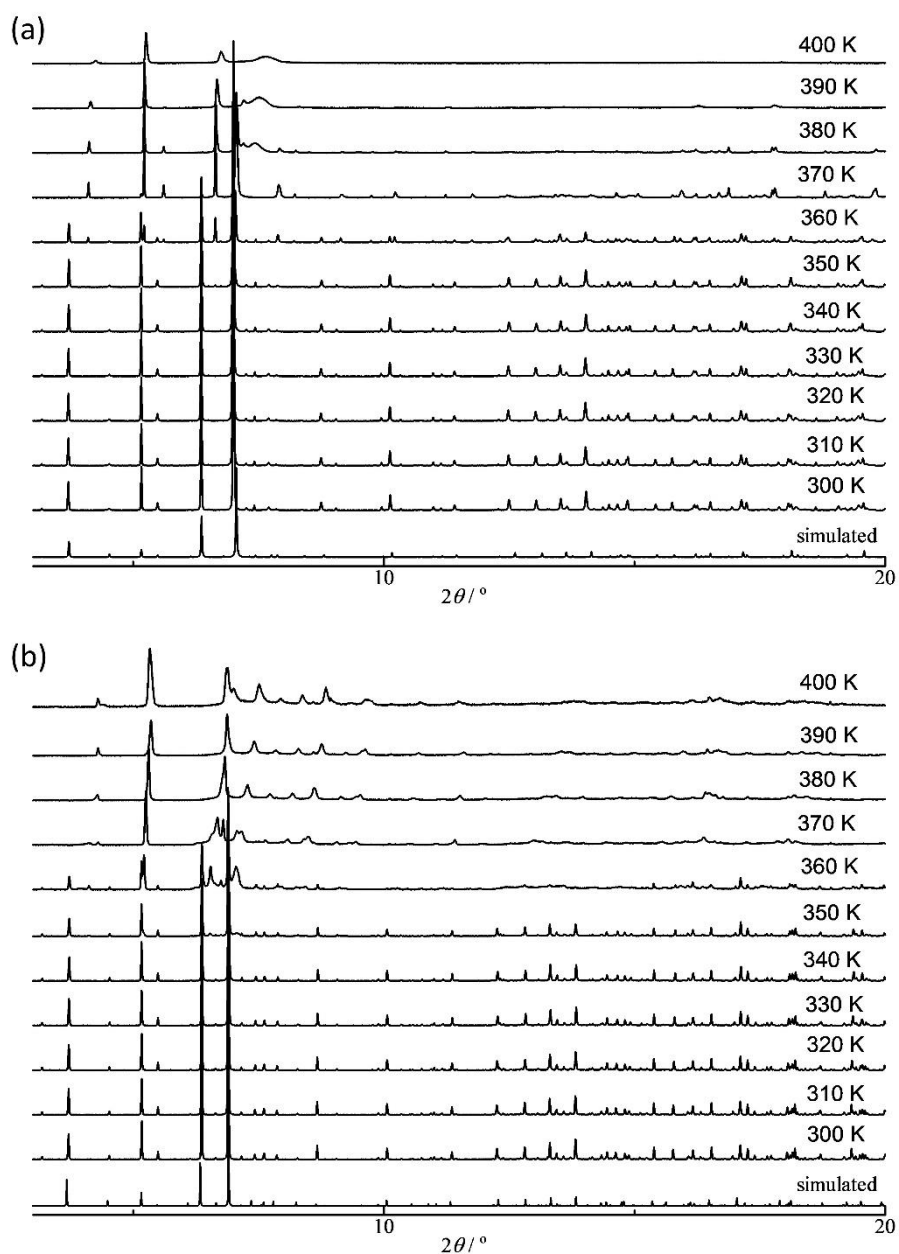

**Fig. S16.** Temperature-dependent PXRD patterns of (a) [2]Cl<sub>4</sub> and (b) [2]Br<sub>4</sub>.

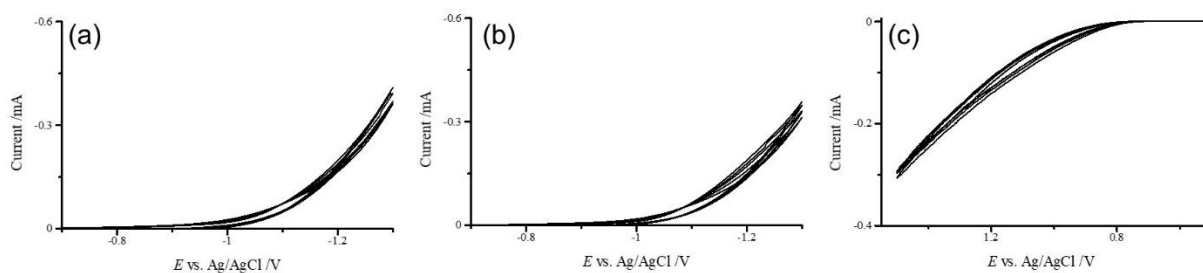

**Fig. S17.** Cyclic voltammograms of the samples modified on glassy carbon electrode in  $\text{H}_2\text{O}-\text{CH}_3\text{CN}$  ( $v/v = 1/4$ ) containing 0.1 M  $\text{LiClO}_4$  in the multi-scanning mode (1st – 5th scans): (a)  $[\mathbf{2}]\text{Cl}_4$  in the negative potential range, (b)  $[\mathbf{2}]\text{Br}_4$  in the negative potential range and (c)  $[\mathbf{2}]\text{Br}_4$  in the positive potential range.

### References.

- [S1] R. M. Wood and G. J. Palenik, *Inorg. Chem.* 1998, **37**, 4149.
- [S2] A. C. M. San Esteban, N. Kuwamura, T. Kojima and T. Konno, *Inorg. Chem.* 2020, **59**, 14847.
- [S3] N. Kuwamura, Y. Kurioka, N. Yoshinari and T. Konno, *Chem. Commun.* 2018, **54**, 10766.
- [S4] Y. Gong, H. F. Shi, Z. Hao, J. L. Sun and J. H. Lin, *Dalton Trans.* 2013, **42**, 12252.
- [S5] P. Manna, S. Debgupta, S. Bose and S. K. Das, *Angew. Chem. Int. Ed.* 2016, **55**, 2425.
- [S6] M. V. Sheridan, Y. Wang, D. Wang, L. Troian-Gautier, C. J. Dares, B. D. Sherman and T. J. Meyer, *Angew. Chem. Int. Ed.* 2018, **57**, 3449.
